# Supplementary material for: Endogenous fluctuations of OCT4 and SOX2 bias pluripotent cell fate decisions
Source: bioRxiv or medRxiv preprint supplement (doi:10.1101/299073), 2019-05-13
Supplement: Supplementary file [file 299073-1.pdf]

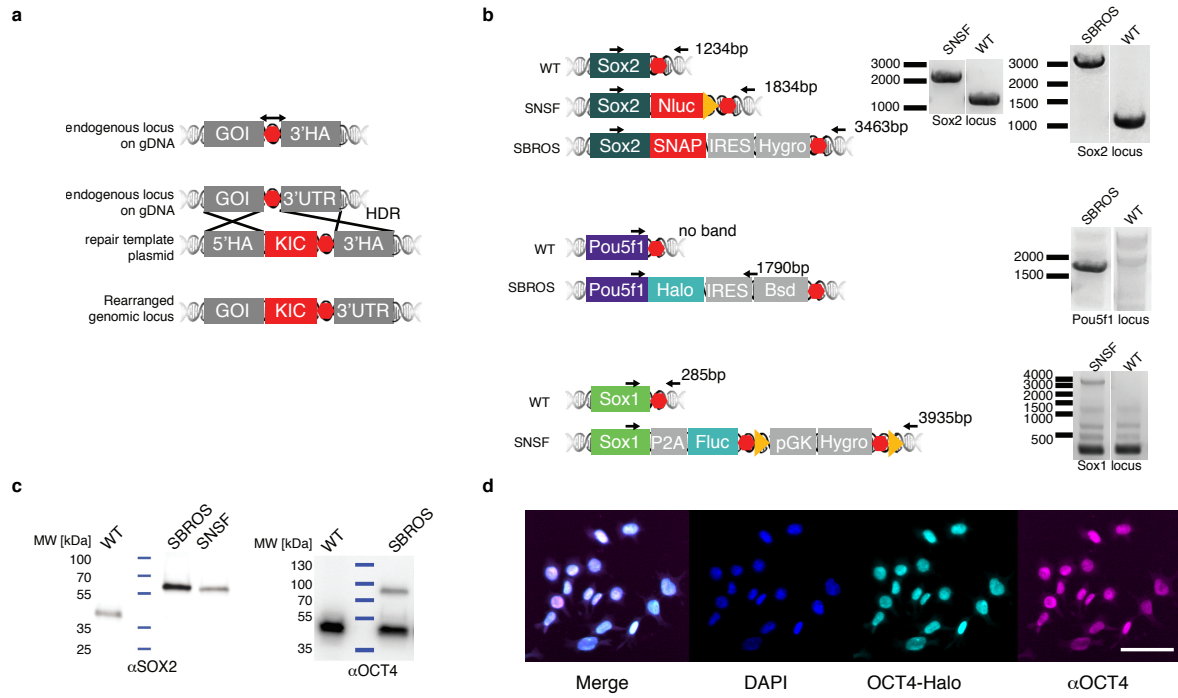

**Supplementary Figure 1: Validation of knock-in cell lines**

**a** General knock-in strategy used in this study. **b** PCRs to verify knocked-in reporters in the SNSF and SBROS cell lines. **c** Western blot confirming the tagging of endogenous SOX2 and OCT4. **d** Example images used for the quantification of total OCT4 (αOCT4) and correlation with heterozygous OCT4-HALO expression.

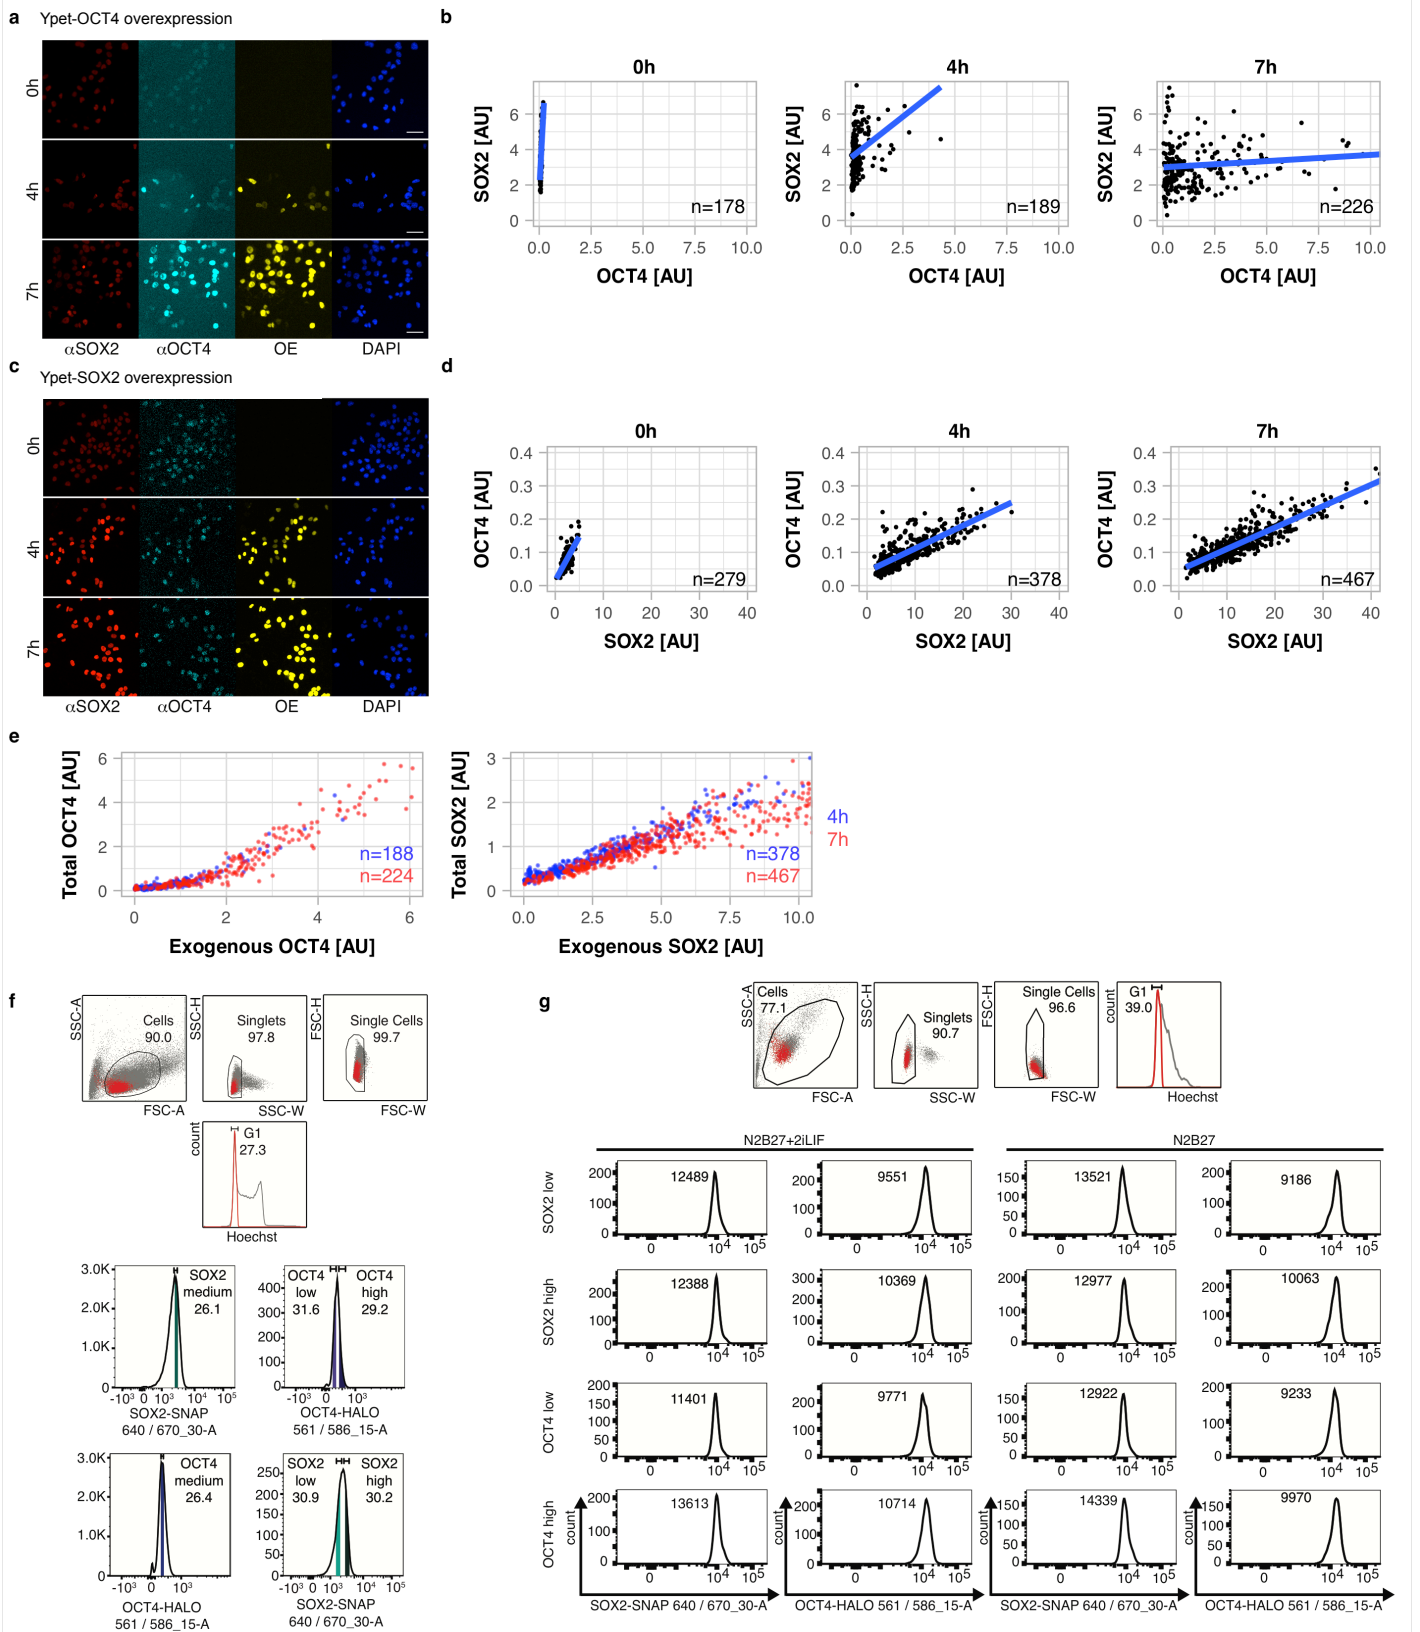

**Supplementary Figure 2: Cross regulation of SOX2 and OCT4**

**a-b** YPET-OCT4 overexpression time-course; **a** fluorescence microscopy images after immunofluorescence staining of SOX2 and OCT4. **b** quantification of total SOX2 and OCT4 levels in single cells. **c-d** YPET-SOX2 overexpression time-course; **c** fluorescence microscopy images after immunofluorescence staining of SOX2 and OCT4. **d** quantification of total SOX2 and OCT4 levels in single cells (0h: R=0.74; 4h: R=0.80; 7h: R=0.89). **e** Total OCT4 or SOX2 as a function of overexpression of YPET-OCT4 or YPET-SOX2, respectively, at 4 hours (blue) and 7 hours (red) after addition of dox. **f** Sorting strategy to sort for endogenous medium levels of SOX2 or OCT4. These populations were then sorted in OCT4 or SOX2 high and low, respectively. **g** Raw data of the determination of SOX2 and OCT4 levels after sorting intermediate SOX2 or OCT4 expressing cells for high or low OCT4 or SOX2 levels, respectively.

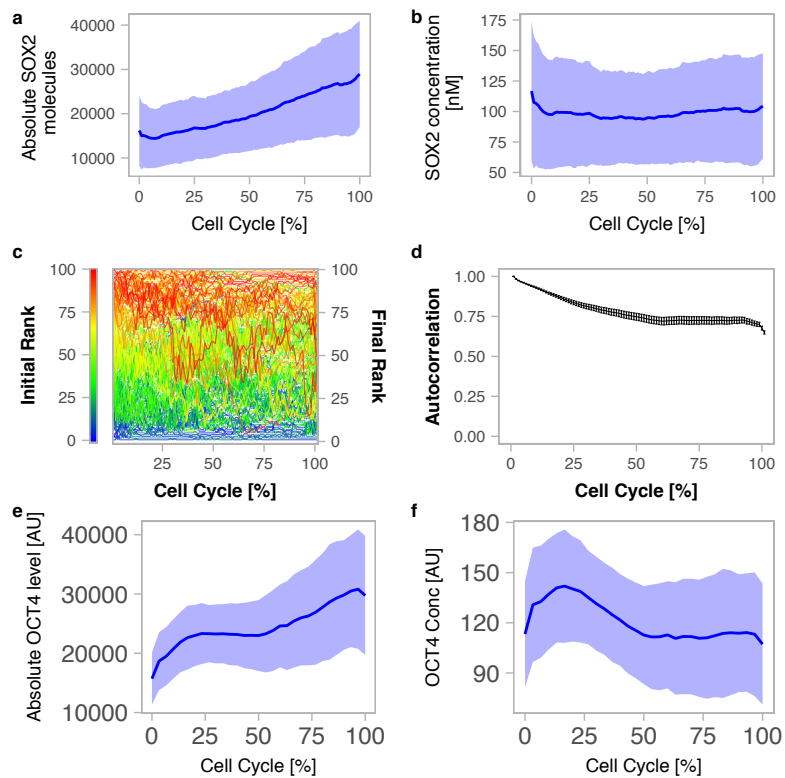

**Supplementary Figure 3: Average SOX2 and OCT4 levels and concentration in pluripotency and SOX2 mixing time using data from one cell cycle**

**a-b** Average of absolute SOX2 protein levels (a) and concentration (b) in pluripotency (N=164 cells, shaded area: SD). **c** Changes of single cell ranks of SOX2 levels over time using data from one cell cycle (N=100 cells). Red: initially high expressing cells; Blue: initially low expressing cells. **d** Rank-based autocorrelation function of the SOX2 ranks. Error bars denote standard error estimated by bootstrapping. **e-f** Average of OCT4 protein levels (e) and concentration (f) in pluripotency (N=48 cells, shaded area: SD).

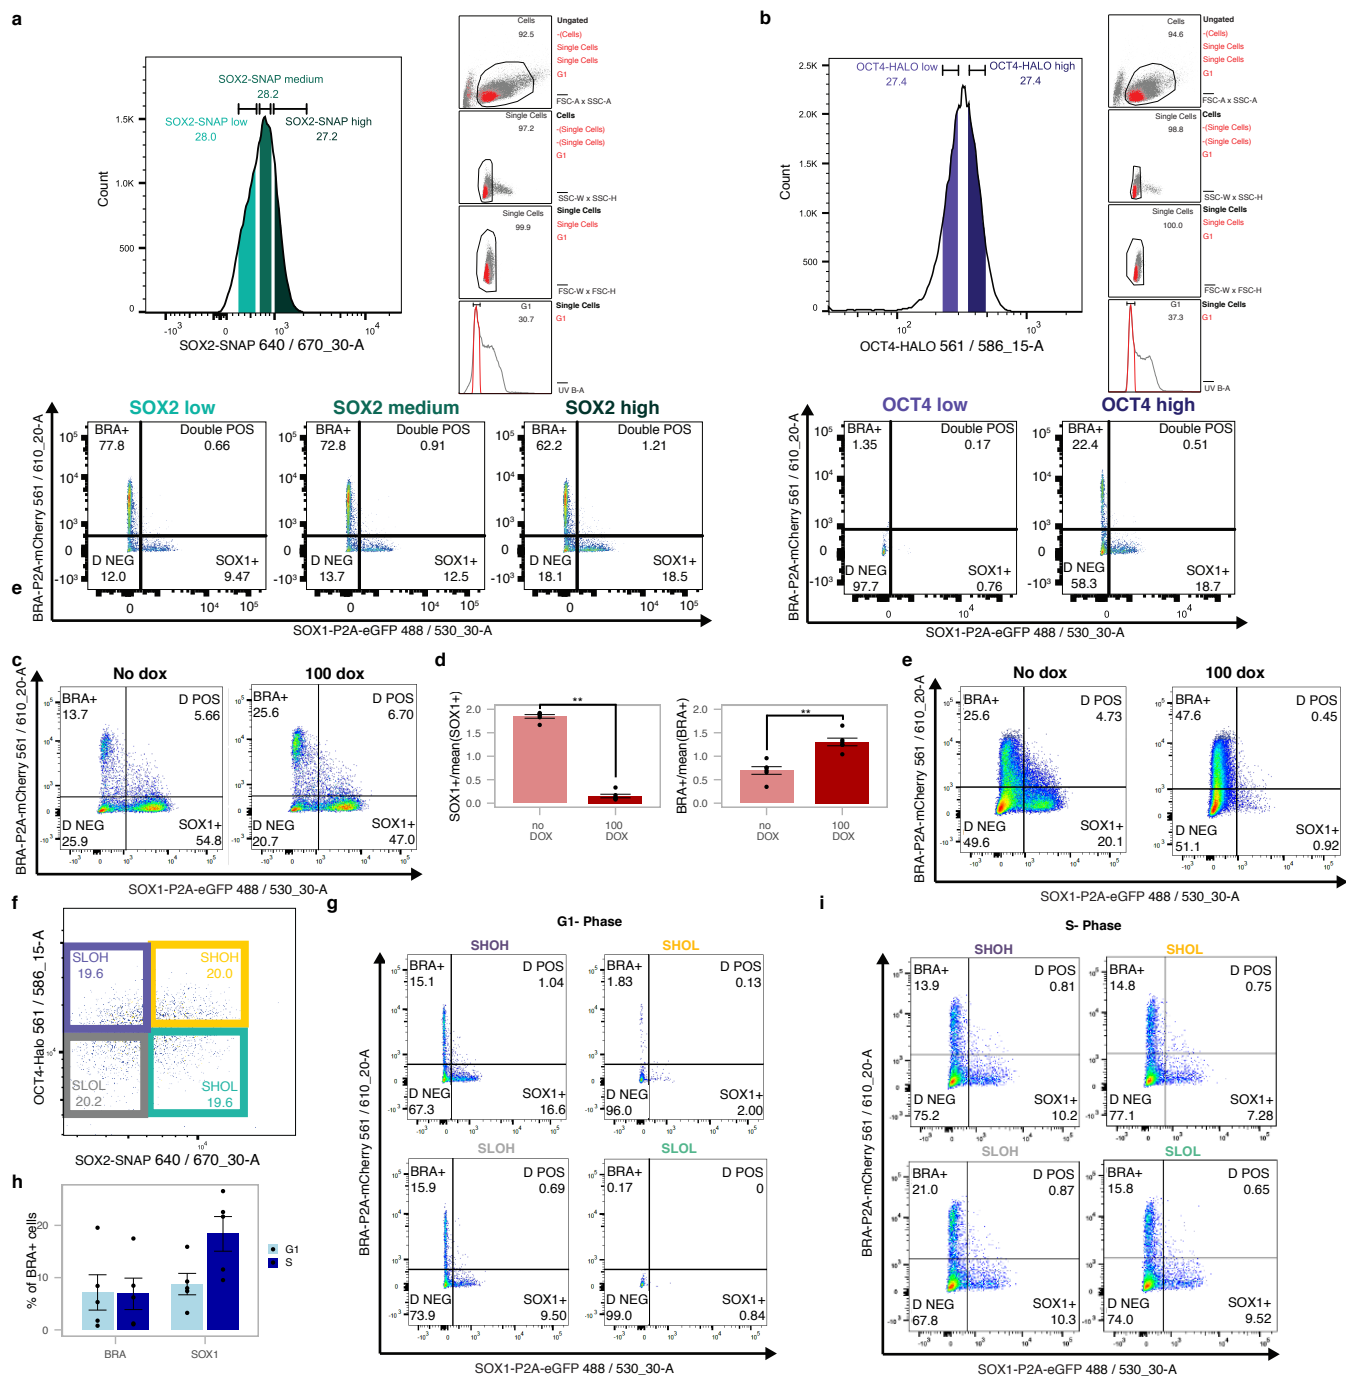

**Supplementary Figure 4: Impact of initial SOX2 and OCT4 levels on differentiation outcomes**

**a,b** Sorting strategies to evaluate the impact of SOX2 (**a**) or OCT4 (**b**) levels on differentiation outcomes and example of flow cytometry data. **c** Example of flow cytometry data after four days of differentiation with or without OCT4 overexpression for 12 hours before differentiation (see Fig.3g). **d** Outcome after four days of differentiation with or without 100ng/ml dox throughout differentiation. % of SOX1+ and BRA+ cells are normalized on the average for each experiment; N=6; \*\* p<0.01. **e** Example of flow cytometry data after four days of differentiation with or without dox throughout differentiation (see Supplementary Fig.4d). **f** Sorting strategy for SHOH, SHOL, SLOH and SLOL populations in G1-phase. **g** Example of flow cytometry data of SHOH, SHOL, SLOH and SLOL sorted in G1 phase (see Fig. 3j). **h** Average fraction of BRA+ and SOX1+ cells after four days of differentiation, when sorted for G1 or S-phase, respectively. Error bars: SE. N=5 experiments. **i** Example of flow cytometry data of SHOH, SHOL, SLOH and SLOL sorted in S phase (see Fig. 3j).



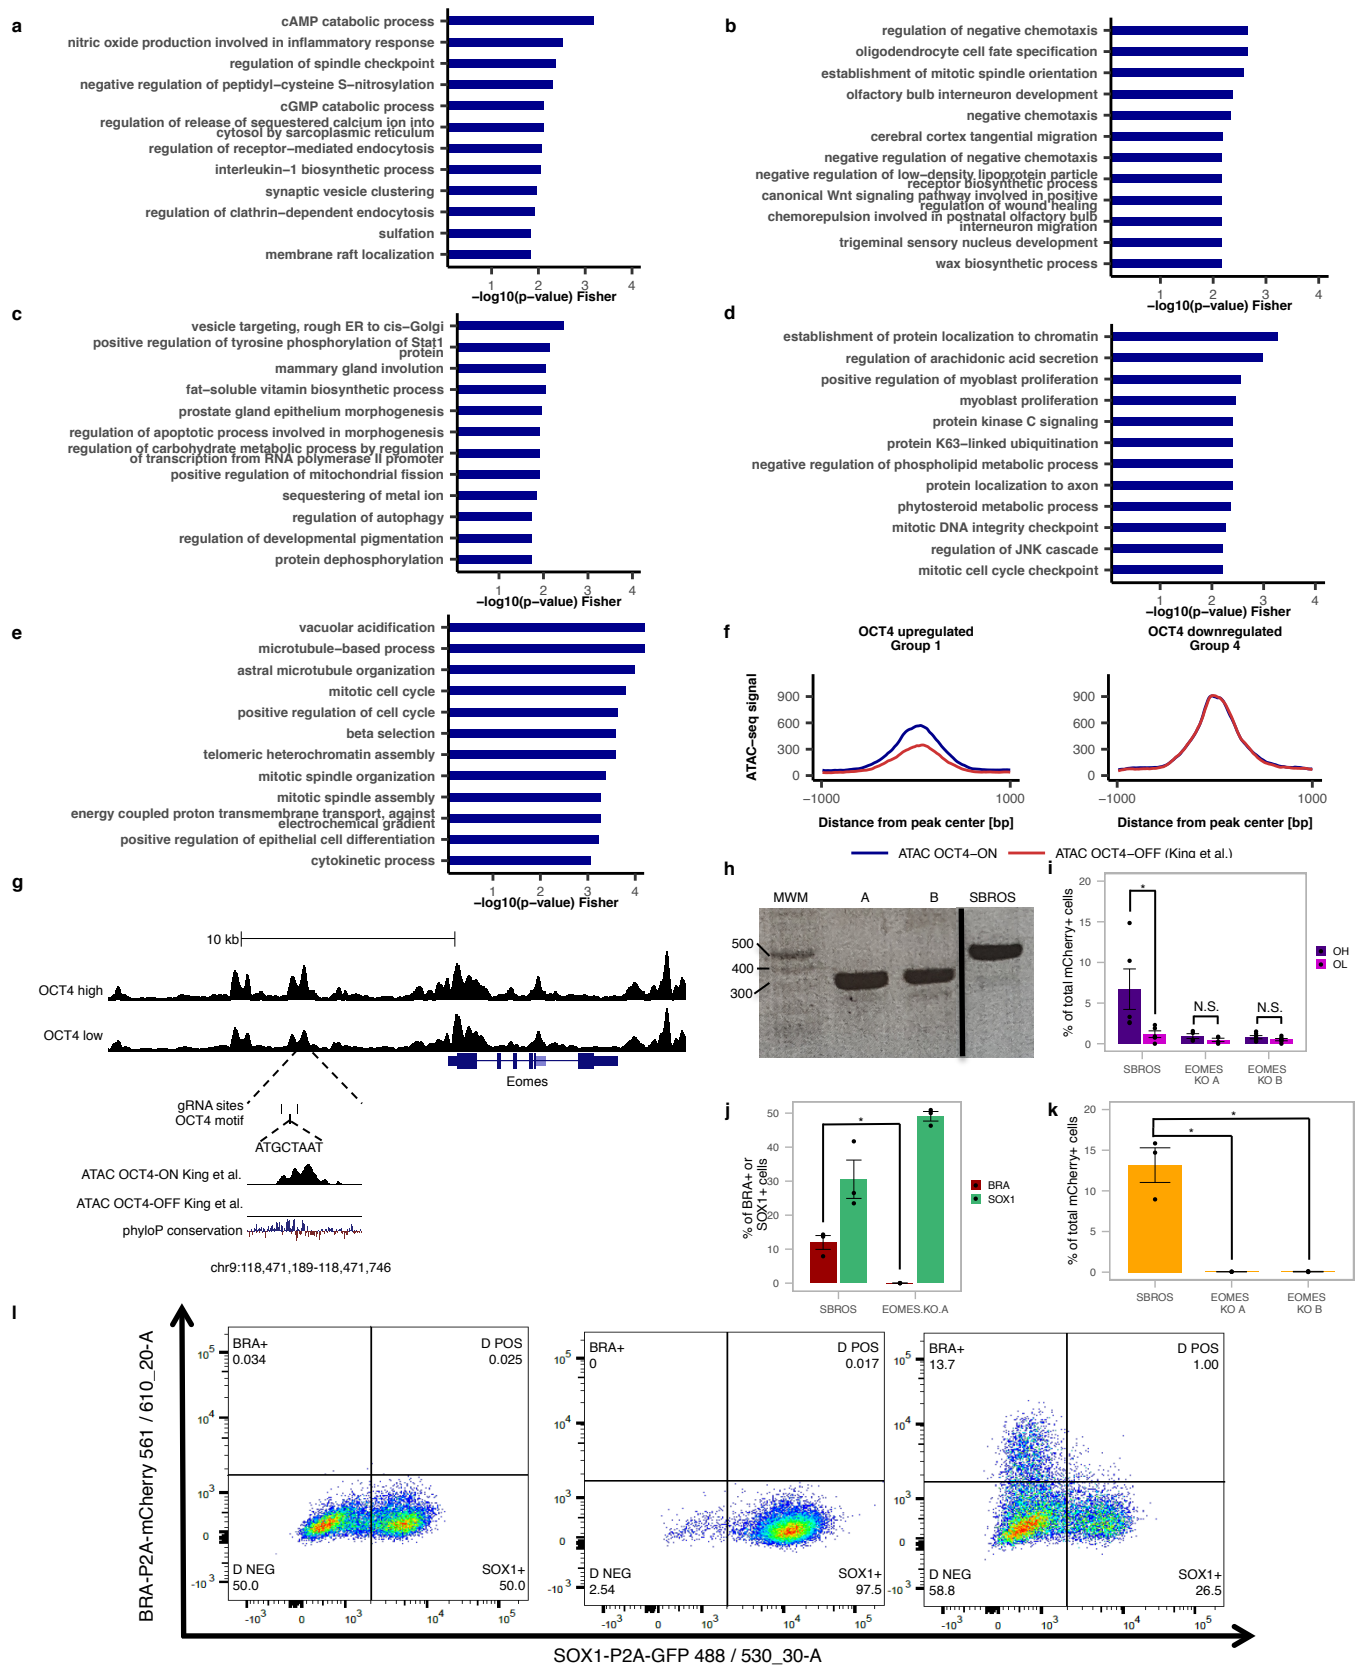

**Supplementary Figure 5: Gene Ontology Enrichment Analysis in groups 2 to 6 from the ATAC-seq analysis and phenotype of *Eomes* enhancer mutants**

**a-e** Top 10 GO terms in group 2, 3, 4, 5 and 6, respectively (see Fig.4). **f** Changes in accessibility upon OCT4 knock-down (data from <sup>19</sup>) of regions up or down-regulated in OH cells. **g** *Eomes* enhancer depending on OCT4, showing the position and sequence of the OCT4 motif, the ATAC-seq signal in the presence or absence of OCT4 (data from <sup>19</sup>), and the PhyloP conservation score for placental mammals. **h** PCR on genomic DNA of the modified *Eomes* enhancer in the *Eomes* KO A and B clone and the parental SBROS cell line. **i** % of total mCherry + cells (GFP- and GFP+) after four days of differentiation for cells sorted in G1-phase for SBROS (N=5 experiments) and *Eomes* KO A (N=4 experiments) and *Eomes* KO B (N=6 experiments) cells. OL: OCT4-low cells; OH: OCT4-high cells. **j** Outcome after four days of differentiation for unsorted SBROS and *Eomes* ES KO A cells (N= 3 experiments). **k** % of total mCherry + cells (GFP- and GFP+) after four days of differentiation for unsorted SBROS, *Eomes* KO A and *Eomes* KO B cells (N= 3 experiments). \* p<0.05. N.S.: non-significant. **l** Example of flow cytometry analysis for experiments shown in panel j and k.

## Supplementary Tables

| SOX2-half-life | OCT4-half-life |
|----------------|----------------|
| 7.66           | 8.63           |
| 7.44           | 6.41           |
| 9.69           | 8.29           |
| 7.70           | 7.17           |
| 7.07           | 7.07           |
| 7.65           | 7.64           |
| 8.61           | 7.39           |
| 7.60           | 7.59           |
| 9.45           | 10.60          |
| 9.55           | 8.88           |
| 9.63           | 5.36           |
| 8.12           | 9.68           |
| 7.66           | 7.29           |
| 6.67           | 8.13           |
| 9.82           | 7.22           |
| 8.37           | 9.52           |
| 7.18           | 8.27           |
| 8.80           | 7.12           |
| 6.70           | 7.35           |
| 7.27           | 5.72           |

Table 1: Raw data showing the protein half-life for SOX2-SNAP and OCT4-HALO in hours in each single cell measured. Figure 1g

| WT    | SNSF  | SBROS |
|-------|-------|-------|
| 14.03 | 17.96 | 14.24 |
| 15.45 | 18.93 | 15.70 |
| 16.38 | 16.76 | 14.67 |
| 19.73 | 16.59 | 16.17 |
| 17.04 | 16.73 | 14.13 |
| 16.42 | 16.39 | 14.99 |
|       |       | 15.45 |
|       |       | 16.82 |

Table 2: Raw data showing the cell cycle duration of the different cell lines in hours. Figure 1h

| YPet-SOX2-delDBD |             |             |
|------------------|-------------|-------------|
| time             | <i>Oct4</i> | <i>Sox2</i> |
| 0                | 1           | 1           |
| 0                | 1           | 1           |
| 0                | 1           | 1           |
| 2                | 1.07        | 0.88        |
| 2                | 0.92        | 1.13        |
| 2                | 0.71        | 0.59        |
| 6                | 1.12        | 0.62        |
| 6                | 0.92        | 1.00        |
| 6                | 0.67        | 0.62        |
| SOX2-SNAP        |             |             |
| time             | <i>Oct4</i> | <i>Sox2</i> |
| 0                | 1           | 1           |
| 0                | 1           | 1           |
| 0                | 1           | 1           |
| 2                | 0.96        | 0.58        |
| 2                | 1.60        | 0.72        |
| 2                | 1.09        | 0.96        |
| 6                | 0.84        | 0.26        |
| 6                | 1.28        | 0.19        |
| 6                | 0.83        | 0.23        |

Table 3: Normalized qPCR data for *Sox2* and *Oct4* mRNA upon YPet-SOX2-delDBD or SOX2-SNAP overexpression. Figure 2b

| Ctrl | Sox2OE |
|------|--------|
| 5.59 | 10.78  |
| 4.36 | 10.12  |
| 4.04 | 6.81   |
| 4.39 | 5.35   |
| 3.79 | 3.89   |
| 3.83 | 4.93   |
| 3.65 | 14.47  |
| 5.66 | 2.95   |
| 4.70 | 8.42   |
| 3.70 | 3.79   |
| 4.25 | 4.63   |
| 4.53 | 6.52   |
| 5.74 | 5.52   |
| 6.24 | 4.68   |
| 5.12 | 10.96  |
| 4.47 | 5.67   |
| 5.17 | 6.04   |
| 3.88 | 6.15   |
| 3.12 | 6.32   |
| 5.53 | 8.19   |

Table 4: Raw data of OCT4 half-life (in hours) with or without SOX2-SNAP overexpression (Sox2OE) in individual cells. Figure 2c

|         | SOX2 high |      |       | SOX2 low |      |       | OCT4 high |      |       | OCT4 low |      |         |       |
|---------|-----------|------|-------|----------|------|-------|-----------|------|-------|----------|------|---------|-------|
| Initial |           | SOX2 | OCT4  |          | SOX2 | OCT4  |           | SOX2 | OCT4  |          | SOX2 | OCT4    |       |
| 1       |           | 4024 | 271   |          | 2340 | 200   |           | 3268 | 328   |          | 3222 | 159     |       |
| 2       |           | 4716 | 516   |          | 2947 | 509   |           | 3771 | 657   |          | 3723 | 385     |       |
| 3       |           | 5312 | 360   |          | 3000 | 354   |           | 4283 | 481   |          | 4240 | 242     |       |
| 4       |           | 2904 | 363   |          | 1488 | 416   |           | 2476 | 553   |          | 2488 | 213     |       |
|         | SOX2 high |      |       | SOX2 low |      |       | OCT4 high |      |       | OCT4 low |      |         |       |
| 8h      | 2iLIF     | n    | SOX2  | OCT4     | n    | SOX2  | OCT4      | n    | SOX2  | OCT4     | n    | SOX2    | OCT4  |
| 1       |           | 4017 | 18570 | 10677    | 1764 | 12437 | 6769      | 3014 | 17800 | 11809    | 1251 | 14752   | 6425  |
| 2       |           | 1171 | 37134 | 22004    | 967  | 32140 | 20656     | 720  | 37848 | 21981    | 533  | 34152   | 19830 |
| 3       |           | 522  | 38511 | 17281    | 3155 | 29544 | 15502     | 2076 | 35557 | 20283    | 1211 | 36378   | 21418 |
| 4       |           | 3186 | 8376  | 11430    | 2458 | 5589  | 12097     | 1394 | 6160  | 12462    | 4788 | 7514    | 8435  |
|         | SOX2 high |      |       | SOX2 low |      |       | OCT4 high |      |       | OCT4 low |      |         |       |
| 8h Diff | n         | SOX2 | OCT4  | n        | SOX2 | OCT4  | n         | SOX2 | OCT4  | n        | SOX2 | OCT4    |       |
| 1       |           | 5371 | 19255 | 10649    | 2224 | 12433 | 6782      | 2077 | 18107 | 12575    | 2039 | 14777   | 7247  |
| 2       |           | 1529 | 39463 | 21126    | 936  | 27365 | 18453     | 1260 | 31363 | 19771    | 567  | 37070   | 18334 |
| 3       |           | 567  | 34713 | 15074    | 2650 | 25516 | 15642     | 1644 | 32022 | 18668    | 1312 | 31604   | 15006 |
| 4       |           | 845  | 7714  | 12914    | 2021 | 5275  | 12232     | 1171 | 5698  | 13029    | 3549 | 7100.00 | 9614  |

Table 5: Raw data from the flow cytometry experiment to test the cross-regulation of endogenous SOX2 and endogenous OCT4. The reported values represent the mean fluorescence intensity of SOX2-SNAP (stained with SiR-647) and OCT4-HALO (stained with TMR dye). n represents the number of cells analysed. Figure 2e,f

|      |       |      |       |       |
|------|-------|------|-------|-------|
| 1    | BRA+  | DPOS | DNEG  | SOX1+ |
| Low  | 76.85 | 0.73 | 12.30 | 10.09 |
| Med  | 72.75 | 0.87 | 13.15 | 13.20 |
| High | 64.85 | 1.03 | 17.90 | 16.25 |
| 2    | BRA+  | DPOS | DNEG  | SOX1+ |
| Low  | 86.75 | 0.01 | 12.85 | 0.40  |
| Med  | 79.80 | 0.04 | 19.30 | 0.89  |
| High | 68.75 | 0.10 | 29.60 | 1.53  |
| 3    | BRA+  | DPOS | DNEG  | SOX1+ |
| Low  | 77.90 | 0.47 | 15.30 | 6.36  |
| Med  | 76.45 | 0.37 | 15.70 | 7.52  |
| High | 76.20 | 0.33 | 15.80 | 7.71  |
| 4    | BRA+  | DPOS | DNEG  | SOX1+ |
| Low  | 87.50 | 0.07 | 10.50 | 1.93  |
| Med  | 86.90 | 0.21 | 9.26  | 3.63  |
| High | 83.60 | 0.27 | 11.80 | 4.37  |
| 5    | BRA+  | DPOS | DNEG  | SOX1+ |
| Low  | 6.72  | 0.24 | 84.00 | 9.07  |
| High | 5.62  | 0.16 | 82.95 | 11.30 |

Table 6: Raw data from the flow cytometry experiment to test the differentiation outcome after sorting for different SOX2 levels. The values represent the percentage of the marker in the population. Figure 3d

|      |       |      |       |       |
|------|-------|------|-------|-------|
| 1    | BRA+  | DPOS | DNEG  | SOX1+ |
| Low  | 1.22  | 0.03 | 95.55 | 3.19  |
| High | 3.34  | 0.14 | 89.35 | 7.18  |
| 2    | BRA+  | DPOS | DNEG  | SOX1+ |
| Low  | 1.13  | 0.25 | 95.10 | 3.51  |
| High | 12.50 | 0.51 | 63.90 | 23.15 |
| 3    | BRA+  | DPOS | DNEG  | SOX1+ |
| Low  | 0.85  | 0.09 | 98.35 | 0.72  |
| High | 16.01 | 0.46 | 66.90 | 16.60 |
| 4    | BRA+  | DPOS | DNEG  | SOX1+ |
| Low  | 0.62  | 0.03 | 88.80 | 10.55 |
| High | 0.72  | 0.09 | 76.55 | 22.65 |

Table 7: Raw data from the flow cytometry experiment to test the differentiation outcome after sorting for different OCT4 levels. The values represent the percentage of the marker in the population. Figure 3e

| SOX1   |              |
|--------|--------------|
| no DOX | 100ng/ml DOX |
| 57.45  | 55.6         |
| 62.85  | 51.75        |
| 53     | 42.65        |
| 69.35  | 72.9         |
| 69.45  | 71.8         |
| 55.55  | 68.45        |
| BRA    |              |
| no DOX | 100ng/ml DOX |
| 12.74  | 4.57         |
| 3.2    | 15.8         |
| 16.25  | 31.5         |
| 0.05   | 0.58         |
| 0.13   | 0.56         |
| 0.07   | 0.09         |

Table 8: Raw data from the flow cytometry experiment to test the impact of OCT4 overexpression before differentiation. The values represent the percentage of the marker in the population. Figure 3g

| 1    | BRA+   | DPOS   | DNEG  | SOX1+ |
|------|--------|--------|-------|-------|
| SHOH | 25.5   | 0.9    | 61.5  | 12.1  |
| SHOL | 25.8   | 0.325  | 67.3  | 6.59  |
| SLOH | 20.5   | 0.49   | 67.2  | 11.8  |
| SLOL | 7.63   | 0.17   | 88.7  | 3.51  |
| 2    | BRA+   | DPOS   | DNEG  | SOX1+ |
| SHOH | 2.905  | 0.07   | 90.3  | 6.69  |
| SHOL | 0.65   | 0.081  | 97.2  | 2.1   |
| SLOH | 0.53   | 0.076  | 95.3  | 4.09  |
| SLOL | 0      | 0      | 96.25 | 3.74  |
| 3    | BRA+   | DPOS   | DNEG  | SOX1+ |
| SHOH | 9.675  | 0.375  | 70.8  | 19.15 |
| SHOL | 0.895  | 0.0535 | 95.95 | 3.08  |
| SLOH | 12.4   | 0.365  | 73.3  | 13.95 |
| SLOL | 0.42   | 0      | 98.5  | 1.05  |
| 4    | BRA+   | DPOS   | DNEG  | SOX1+ |
| SHOH | 11.115 | 0.635  | 71.75 | 16.45 |
| SHOL | 3.52   | 0.26   | 91.7  | 4.49  |
| SLOH | 17.34  | 0.695  | 72.75 | 9.24  |
| SLOL | 2.95   | 0.23   | 93.9  | 2.935 |
| 5    | BRA+   | DPOS   | DNEG  | SOX1+ |
| SHOH | 0.5375 | 0.1325 | 73.8  | 25.55 |
| SHOL | 0.084  | 0.084  | 87.1  | 12.7  |
| SLOH | 1.11   | 0.1665 | 80.45 | 18.25 |
| SLOL | 0.165  | 0.0725 | 94.6  | 5.145 |

Table 9: Raw data from the flow cytometry experiment to test the differentiation outcome after sorting for different SOX2 and OCT4 level combinations in G1 phase. The values represent the percentage of the marker in the population. Figure 3i

| 1    | BRA+  | DPOS   | DNEG  | SOX1+ |
|------|-------|--------|-------|-------|
| SHOH | 4.17  | 0.48   | 58.2  | 37.2  |
| SHOL | 5.15  | 0.34   | 72.7  | 21.8  |
| SLOH | 7.75  | 0.61   | 64.1  | 27.5  |
| SLOL | 7.79  | 0.32   | 72.2  | 19.7  |
|      |       |        |       |       |
| 2    | BRA+  | DPOS   | DNEG  | SOX1+ |
| SHOH | 0.62  | 0.15   | 80.2  | 19    |
| SHOL | 0.61  | 0.21   | 79.7  | 19.4  |
| SLOH | 1.56  | 0.41   | 71.1  | 26.9  |
| SLOL | 1.46  | 0.35   | 73.2  | 24.9  |
|      |       |        |       |       |
| 3    | BRA+  | DPOS   | DNEG  | SOX1+ |
| SHOH | 0.43  | 0.135  | 73.3  | 26.1  |
| SHOL | 0.455 | 0.0995 | 81.8  | 17.65 |
| SLOH | 2.705 | 0.67   | 67.45 | 29.15 |
| SLOL | 1.34  | 0.28   | 84.55 | 13.8  |
|      |       |        |       |       |
| 4    | BRA+  | DPOS   | DNEG  | SOX1+ |
| SHOH | 16.9  | 1.56   | 66.2  | 15.4  |
| SHOL | 3.75  | 0.27   | 90.1  | 5.84  |
| SLOH | 3.34  | 0.41   | 86.6  | 9.67  |
| SLOL | 9.84  | 1.4    | 73.5  | 15.3  |
|      |       |        |       |       |
| 5    | BRA+  | DPOS   | DNEG  | SOX1+ |
| SHOH | 13.45 | 0.775  | 76.05 | 9.745 |
| SHOL | 13.8  | 0.765  | 77.8  | 7.57  |
| SLOH | 22.3  | 1.205  | 64.95 | 11.5  |
| SLOL | 20.4  | 0.93   | 69.35 | 9.29  |

Table 10: Raw data from the flow cytometry experiment to test the differentiation outcome after sorting for different SOX2 and OCT4 level combinations in S phase. The values represent the percentage of the marker in the population. Figure 3j

|      | Nanog | Esrrb | Otx2 | Fgf5 | Fgf4 | Gata4 | Gata6 | Eomes | Ascl1 |
|------|-------|-------|------|------|------|-------|-------|-------|-------|
| SHOH | 1.18  | 0.81  | 1.35 | 1.53 | 1.23 | 0.43  | 0.95  | 0.75  | 1.21  |
| SHOH | 0.76  | 0.96  | 0.99 | 0.96 | 0.86 | 0.55  | 0.39  | 0.87  | 1.96  |
| SHOH | 0.62  | 0.85  | 1.53 | 1.06 | 1.29 | 0.66  | 0.45  | 1.10  | 3.61  |
| SHOL | 1.10  | 0.93  | 1.11 | 0.93 | 0.90 | 0.96  | 1.06  | 0.81  | 0.64  |
| SHOL | 0.90  | 0.76  | 0.85 | 0.82 | 0.82 | 0.46  | 0.80  | 0.69  | 0.93  |
| SHOL | 1.16  | 1.25  | 0.92 | 0.78 | 0.93 | 1.55  | 1.06  | 0.93  | 1.30  |
| SLOH | 0.97  | 0.84  | 1.66 | 1.49 | 1.13 | 0.46  | 1.18  | 1.00  | 1.95  |
| SLOH | 0.79  | 0.67  | 1.09 | 1.08 | 0.93 | 0.35  | 0.47  | 0.73  | 1.55  |
| SLOH | 0.54  | 0.98  | 1.26 | 1.13 | 1.16 | 1.13  | 0.55  | 1.10  | 1.18  |
| SLOL | 1.00  | 1.00  | 1.00 | 1.00 | 1.00 | 1.00  | 1.00  | 1.00  | 1.00  |
| SLOL | 1.00  | 1.00  | 1.00 | 1.00 | 1.00 | 1.00  | 1.00  | 1.00  | 1.00  |
| SLOL | 1.00  | 1.00  | 1.00 | 1.00 | 1.00 | 1.00  | 1.00  | 1.00  | 1.00  |

Table 11: qPCR data after 24 hours of differentiation normalised to SOX2-low, OCT4 low cells. Figure 3k

|           |      |      |       |       |             |
|-----------|------|------|-------|-------|-------------|
| 1         | BRA+ | DPOS | DNEG  | SOX1+ | DPOS + BRA+ |
| OCT4 low  | 0.51 | 0.27 | 94.40 | 4.85  | 0.78        |
| OCT4 high | 0.14 | 0.23 | 71.15 | 28.45 | 0.37        |
| 2         | BRA+ | DPOS | DNEG  | SOX1+ | SOX1+       |
| OCT4 low  | 0.00 | 0.00 | 91.85 | 8.14  | 0.00        |
| OCT4 high | 0.23 | 1.10 | 69.00 | 29.65 | 1.33        |
| 3         | BRA+ | DPOS | DNEG  | SOX1+ | SOX1+       |
| OCT4 low  | 0.06 | 0.19 | 78.30 | 21.40 | 0.25        |
| OCT4 high | 0.31 | 0.20 | 62.40 | 37.10 | 0.51        |
| 4         | BRA+ | DPOS | DNEG  | SOX1+ | SOX1+       |
| OCT4 low  | 0.43 | 0.43 | 88.40 | 10.70 | 0.86        |
| OCT4 high | 0.78 | 0.78 | 72.50 | 25.90 | 1.56        |

Table 12: Raw data from the flow cytometry experiment to test the differentiation outcome after sorting for different OCT4 levels in EOMES KO A cells in G1 phase. The values represent the percentage of the marker in the population. Figure 4g

| SOX1   |              |
|--------|--------------|
| no DOX | 100ng/ml DOX |
| 4.0    | 0.8          |
| 6.0    | 0.3          |
| 24.2   | 1.7          |
| 5.0    | 0.3          |
| 20.0   | 0.8          |
| 23.6   | 2.2          |
| BRA    |              |
| no DOX | 100ng/ml DOX |
| 0.4    | 1.9          |
| 26.3   | 43.1         |
| 21.6   | 44.0         |
| 72.4   | 78.7         |
| 25.6   | 47.6         |
| 29.7   | 49.0         |

Table 13: Raw data from the flow cytometry experiment to test the impact of OCT4 overexpression during differentiation. The values represent the percentage of the marker in the population. Figure S4d

| G1    | S     | marker |
|-------|-------|--------|
| 7.43  | 26.55 | SOX1   |
| 3.25  | 22.55 | SOX1   |
| 9.26  | 21.68 | SOX1   |
| 7.98  | 11.55 | SOX1   |
| 15.90 | 9.53  | SOX1   |
| 19.55 | 6.22  | BRA    |
| 0.79  | 1.06  | BRA    |
| 5.31  | 1.23  | BRA    |
| 8.41  | 8.46  | BRA    |
| 1.76  | 17.49 | BRA    |

Table 14: Raw data showing the % of SOX1+ or BRA+ cells in G1 or S phase for differentiating SBROS cells. The values represent the percentage of the marker in the population. Figure S4h

| OL   | OH    |            |
|------|-------|------------|
| 0.75 | 2.55  | SBROS      |
| 0.90 | 10.20 | SBROS      |
| 0.00 | 14.85 | SBROS      |
| 1.90 | 3.30  | SBROS      |
| 2.30 | 2.64  | SBROS      |
| 0.78 | 0.37  | EOMES KO A |
| 0.00 | 1.33  | EOMES KO A |
| 0.25 | 0.51  | EOMES KO A |
| 0.86 | 1.56  | EOMES KO A |
| 0.31 | 0.37  | EOMES KO B |
| 0.71 | 0.63  | EOMES KO B |
| 0.57 | 0.26  | EOMES KO B |
| 0.98 | 1.23  | EOMES KO B |
| 0.44 | 0.84  | EOMES KO B |
| 0.00 | 1.50  | EOMES KO B |

Table 15: Raw data showing the amount of BRA+ plus DPOS cells (% of total mCherry+ cells) in G1 sorted cells. The values represent the sum of the markers in the population. Figure S5i

| SBROS | EOMES KO A | marker |
|-------|------------|--------|
| 41.70 | 50.90      | SOX1   |
| 26.50 | 50.00      | SOX1   |
| 23.48 | 46.30      | SOX1   |
| 14.30 | 0.00       | BRA    |
| 13.70 | 0.03       | BRA    |
| 7.91  | 0.01       | BRA    |

Table 16: Raw data showing the percentage of the given marker in unsorted SBROS or EOMES KO A cells. Figure S5j

| SBROS | EOMES KO A | EOMES KO B |
|-------|------------|------------|
| 15.84 | 0.04       | 0.03       |
| 14.70 | 0.06       | 0.02       |
| 8.95  | 0.05       | 0.13       |

Table 17: Raw data showing the amount of BRA+ plus DPOS cells (% of total mCherry+ cells) in unsorted cells. The values represent the sum of the % of the markers in the population. Figure S5k
